# Supplementary material for: Spectroscopic studies on the interaction of terpyridine-CuCl2 with cysteine
Source: Royal Society of Chemistry journal article supplement (doi:10.1039/c5ra08234j), 2015-01-01

## Supplementary Information for

# Spectroscopic Studies on the Interaction of Terpyridine-CuCl<sub>2</sub> with Cysteine

Xiyuan Zhou,<sup>a</sup> Zeng Huang,<sup>b</sup> Yuan Cao,<sup>a</sup> Shanshan Yu,<sup>\*b</sup> Xiaoqi Yu,<sup>b</sup> Gang Zhao,<sup>\*a</sup> Lin Pu<sup>\*bc</sup>

<sup>a</sup> College of Chemical Engineering, Sichuan University, Chengdu, China 610064.

<sup>b</sup> Key Laboratory of Green Chemistry and Technology, Ministry of Education, College of Chemistry, Sichuan University, Chengdu, China 610064.

<sup>c</sup> Department of Chemistry, University of Virginia, Charlottesville, Virginia 22904.

Email Address: yushanshan@scu.edu.cn, gzhao@scu.edu.cn, lp6n@virginia.edu

## Supplementary Mass Spectra

Figure S1. Mass spectra of TpyCuCl<sub>2</sub>.

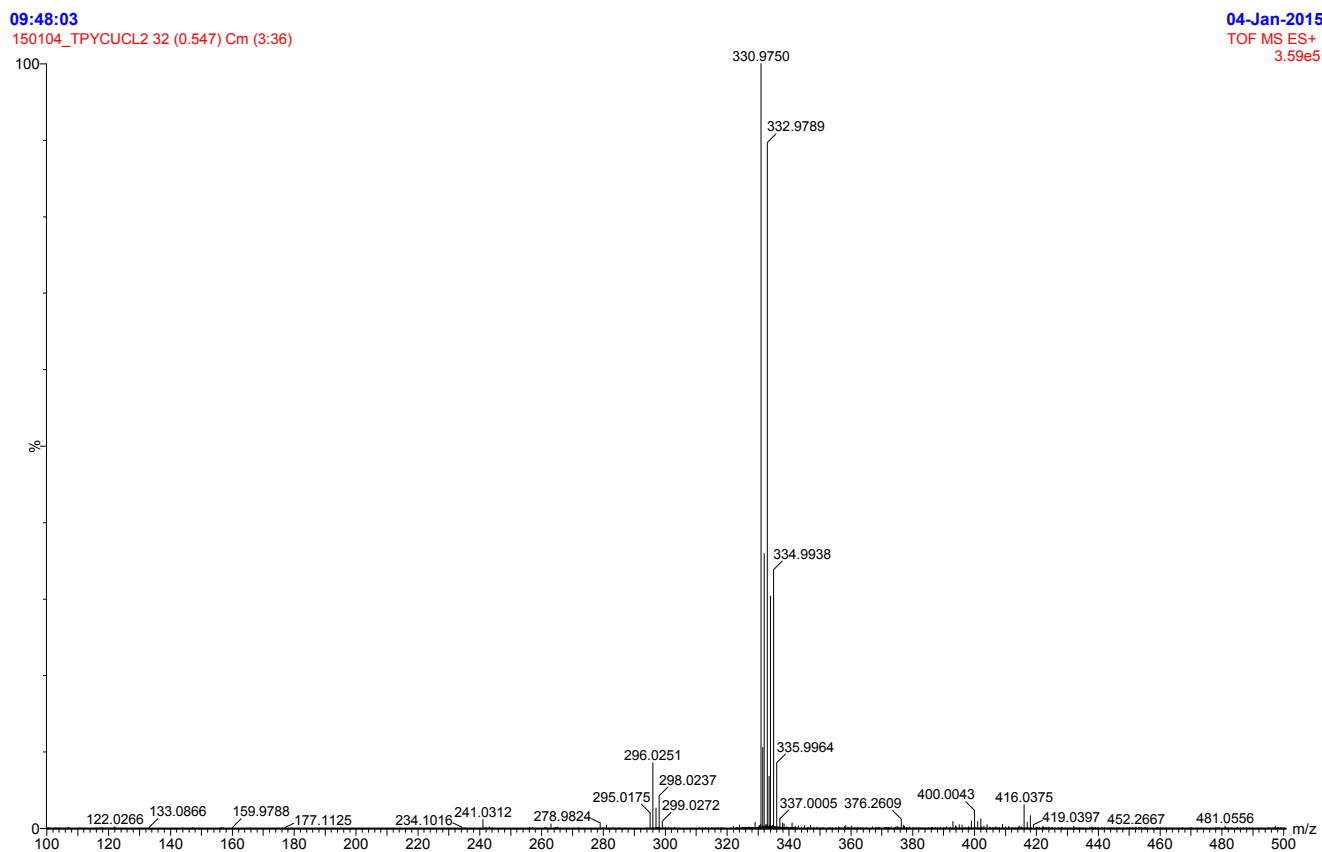

**Figure S2.** Mass spectra of TpyCuCl<sub>2</sub> (4.0 × 10<sup>-3</sup> M in water) treat with 1 equiv cysteine.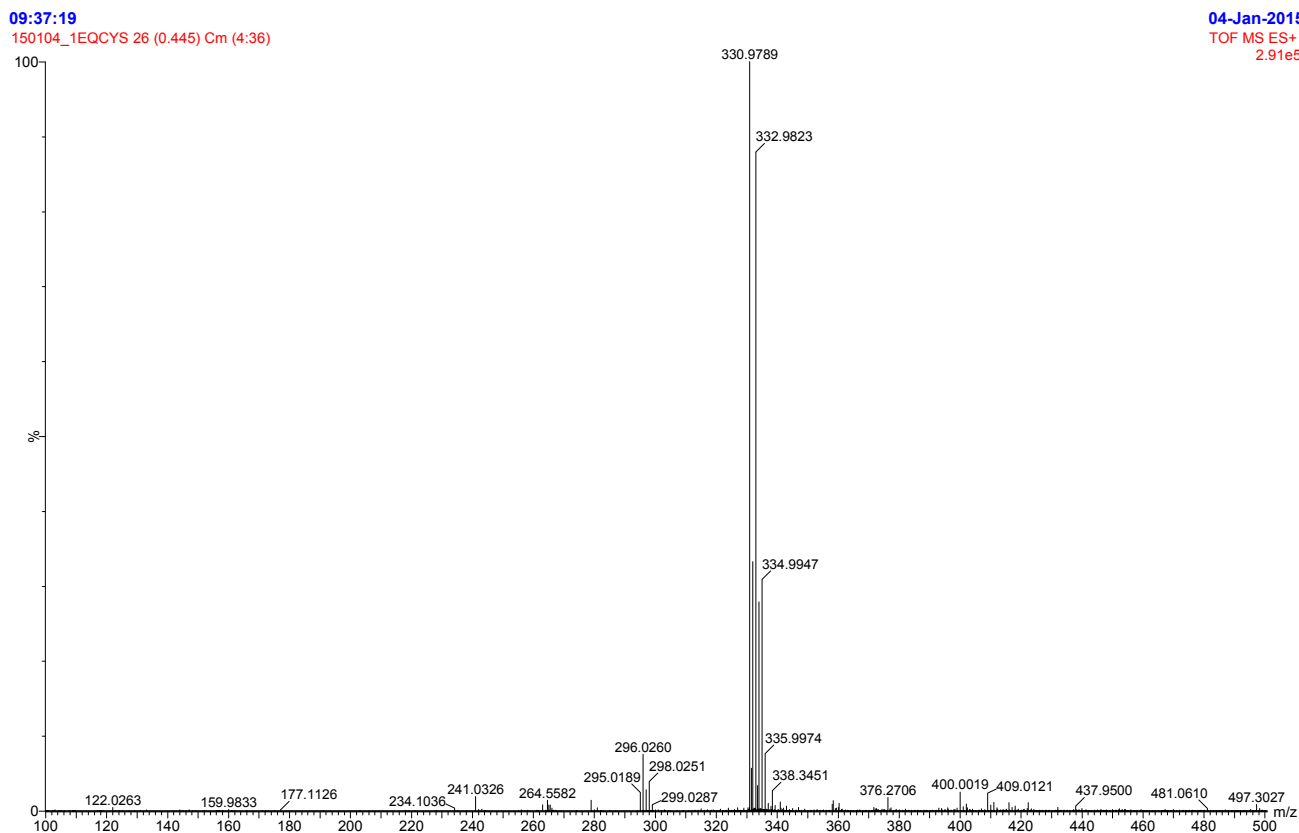**Figure S3.** Mass spectra of TpyCuCl<sub>2</sub> (4.0 × 10<sup>-3</sup> M in water) treat with 10 equiv cysteine.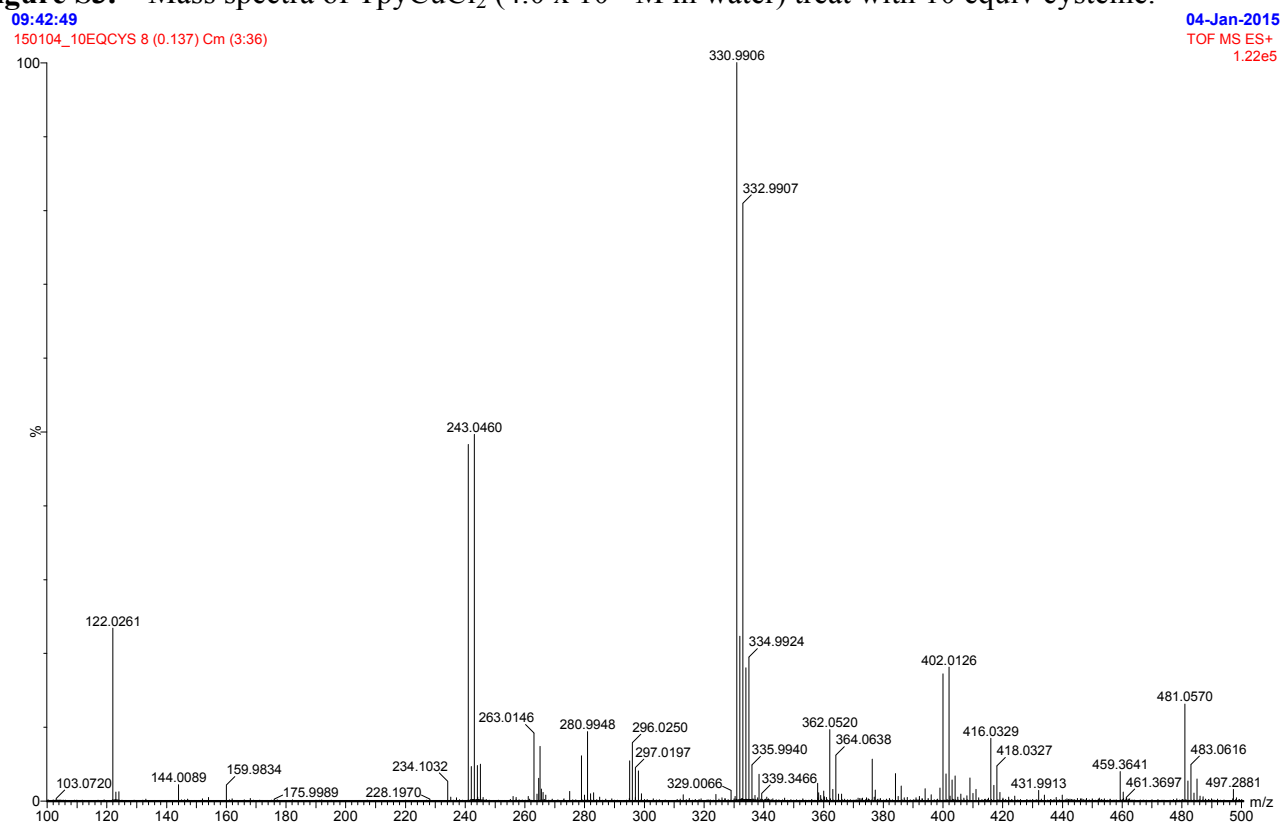

**Figure S4.** Mass spectra of TpyCuCl<sub>2</sub> (4.0 × 10<sup>-3</sup> M in water) treat with 20 equiv cysteine (< 24 h).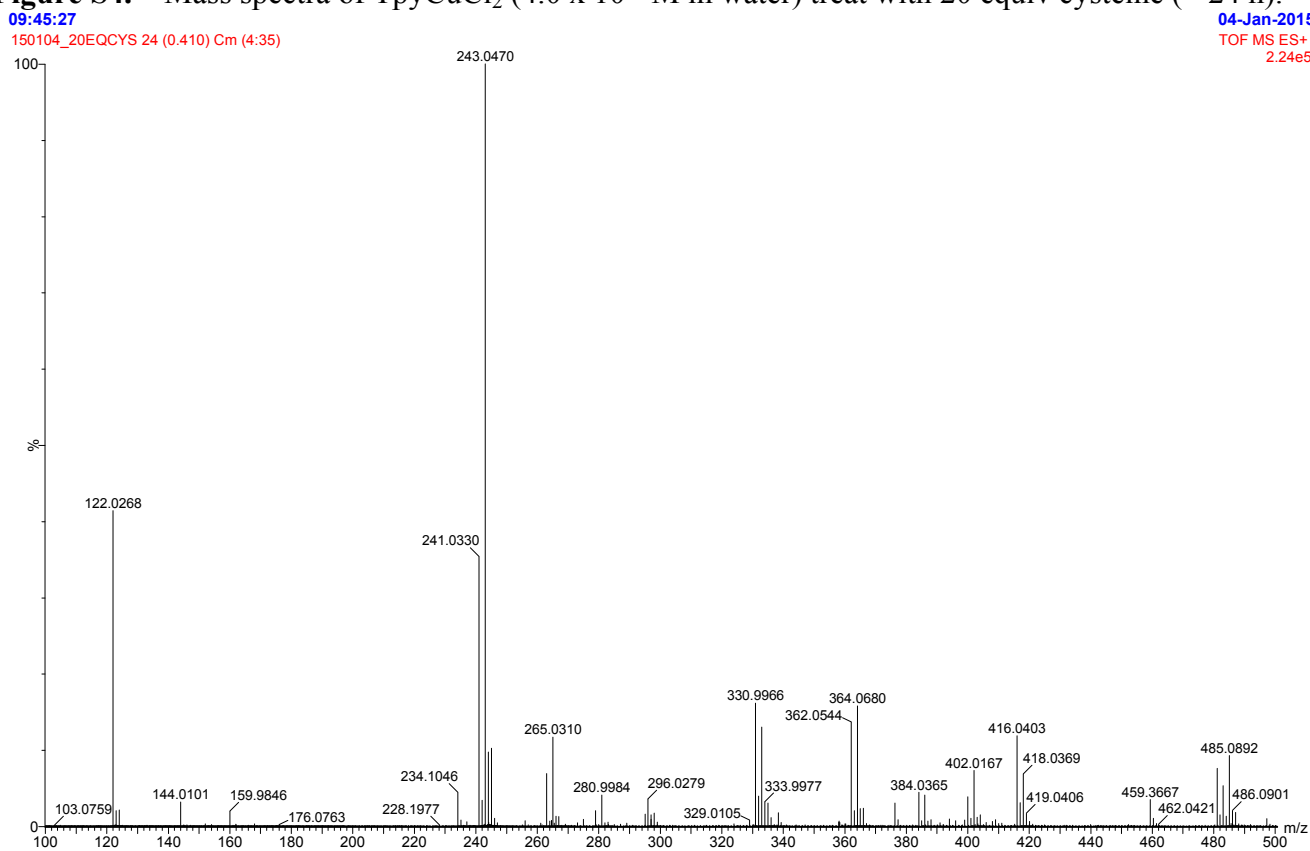**Figure S5.** Mass spectra of TpyCuCl<sub>2</sub> (1 mM in water) treat with 20 equiv cysteine (pH was adjusted to 7.4 with NaOH solution).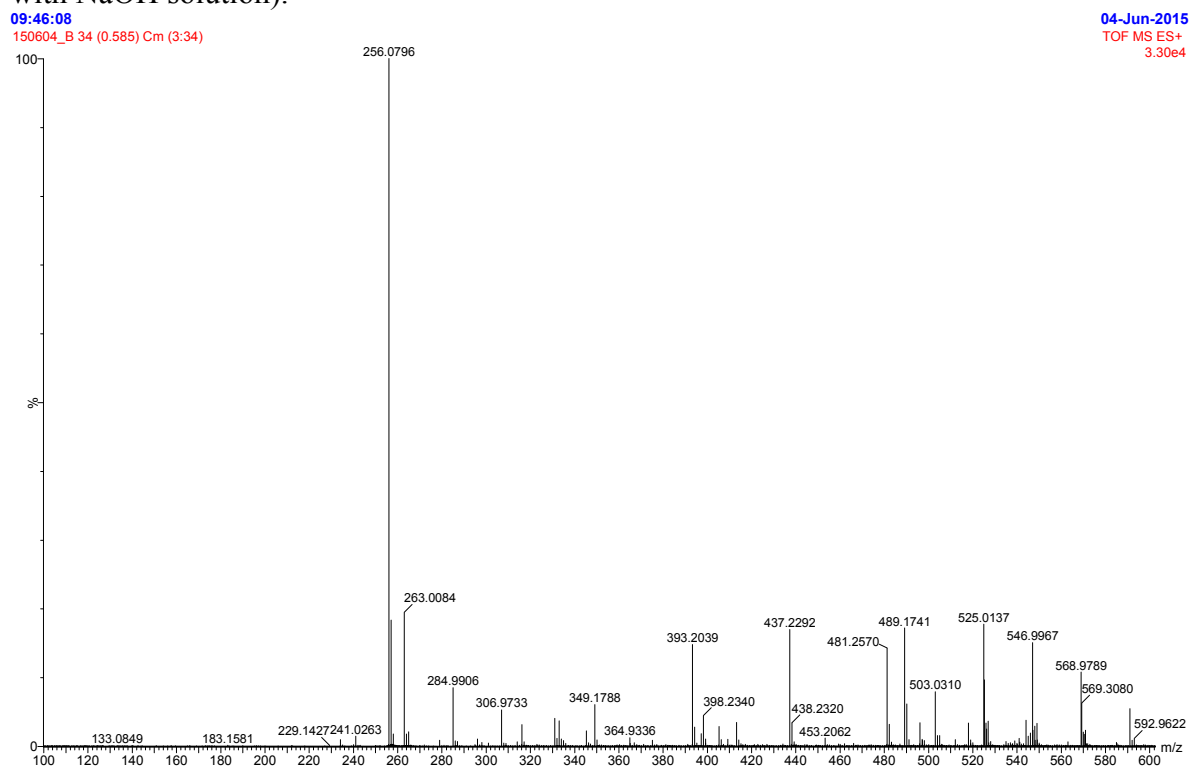

Supplement: c5ra08234j1.pdf [file c5ra08234j1.pdf]
